# Supplementary material
Source: ML conference proceedings conference paper supplement (https://openaccess.thecvf.com/content/CVPR2024/html/Weng_Desigen_A_Pipeline_CVPR_2024_paper.html)
Supplement: Supplementary file 1 [file Weng_Desigen_A_Pipeline_CVPR_2024_supplemental.pdf]

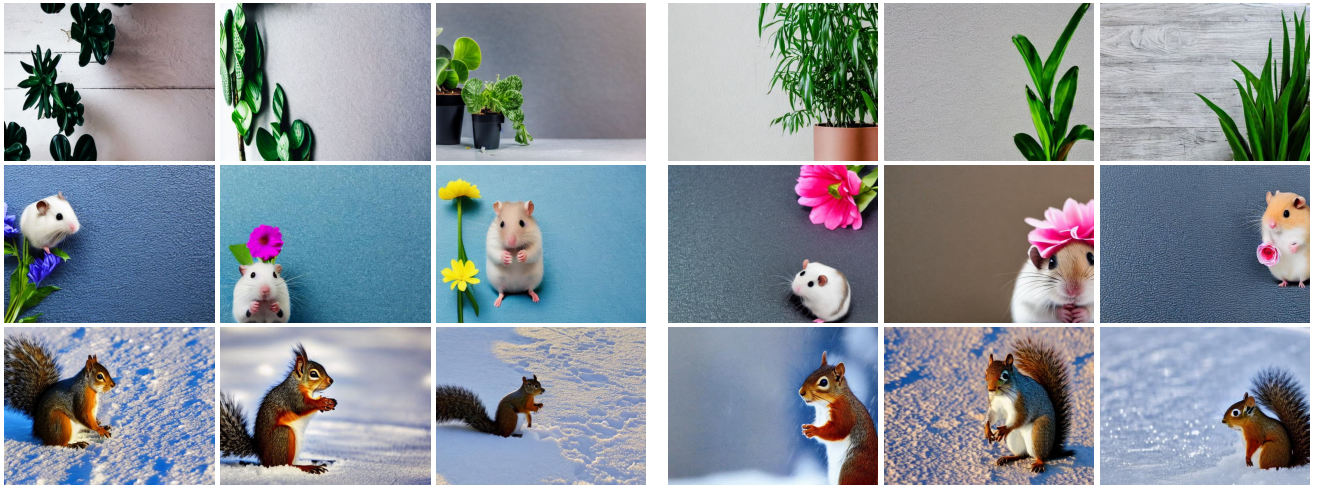

Figure 3. The proposed model can synthesize varying background images given the same text prompts. The prompt of the first row: green plants with white background; the second row: Cute little hamster with flower; the third row: Squirrel in the snow.

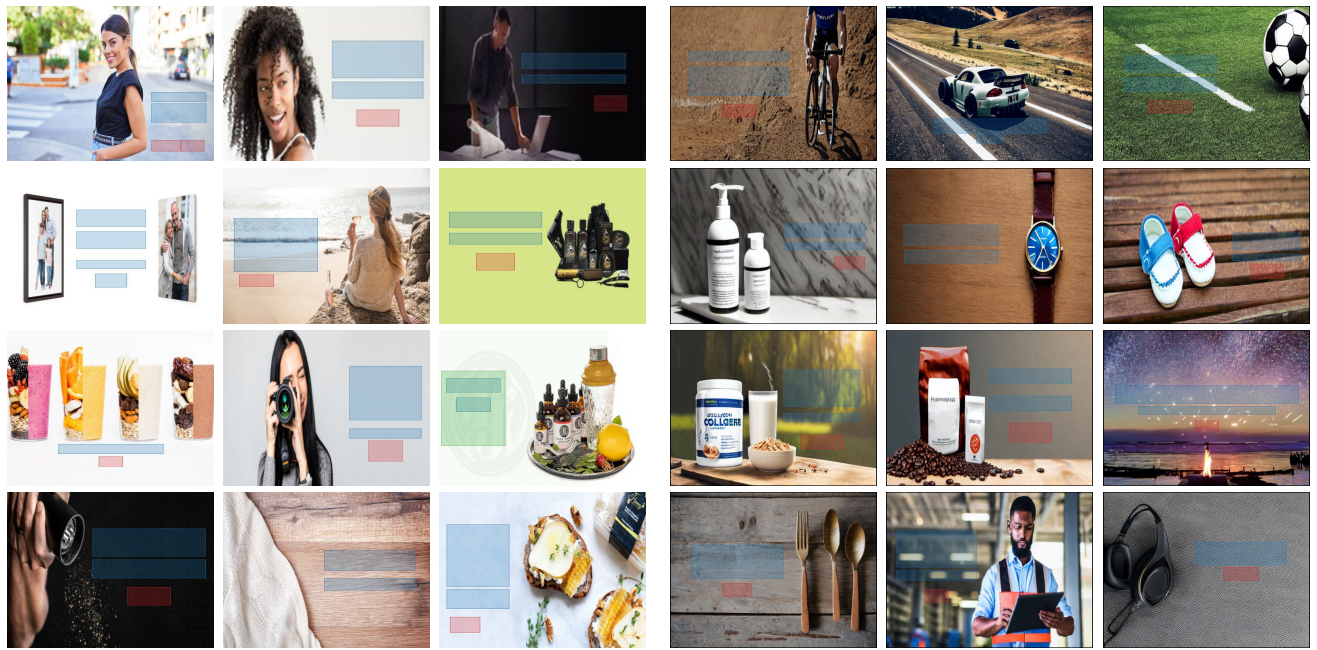

(a) Designs based on real background

(b) Designs based on generated background

Figure 4. More synthesized layouts via the proposed layout generator, where the blue boxes represent text elements, red boxes represent button elements and green boxes represent image elements.



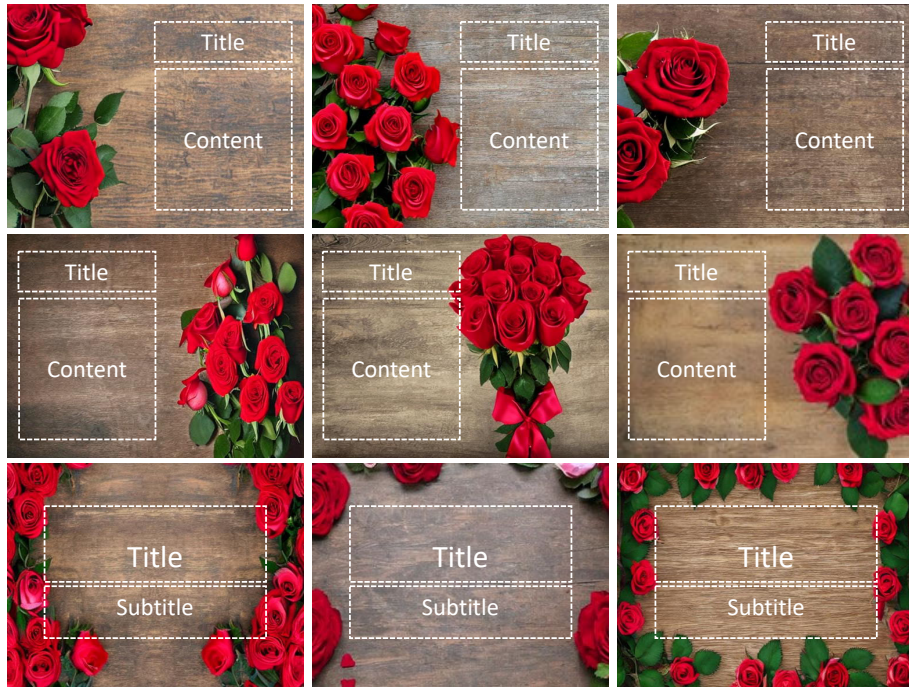

Figure 7. Additional results for slide deck generation with the same prompts and different attention reduction masks (Prompt: Rose for Valentine's Day).
